# Supplementary material for: Association of Electronic Nicotine Delivery System Use With Cigarette Smoking Relapse Among Former Smokers in the United States
Source: PubMed Central journal article supplement (PMC7275247; doi:10.1001/jamanetworkopen.2020.4813), 2020-06-05
Supplement: jamanetwopen-3-e204813-s001.pdf [file jamanetwopen-3-e204813-s001.pdf]

## Supplementary Online Content

Everard CD, Silveira ML, Kimmel HL, Marshall D, Blanco C, Compton WM. Association of electronic nicotine delivery system use with cigarette smoking relapse among former smokers in the United States. *JAMA Netw Open*. 2020;3(6):e204813. doi:10.1001/jamanetworkopen.2020.4813

**eTable 1.** Univariate Cox Proportional Hazards Models Assessing Associations of Characteristics With Cigarette Smoking Relapse for the All Former Group

**eTable 2.** Univariate Cox Proportional Hazards Models Assessing Associations of Characteristics With Cigarette Smoking Relapse for Recent Former Group

**eTable 3.** Univariate Cox Proportional Hazards Models Assessing Associations of Characteristics With Cigarette Smoking Relapse for Long-Term Former Group

**eTable 4.** Cox Proportional Hazards Model with Covariates Assessing Associations of Characteristics With Cigarette Smoking Relapse for All Former Group

**eTable 5.** Cox Proportional Hazards Model with Covariates Assessing Associations of Characteristics With Cigarette Smoking Relapse for Recent Former Group

**eTable 6.** Cox Proportional Hazards Model with Covariates Assessing Associations of Characteristics With Cigarette Smoking Relapse for Long-Term Former Group

This supplementary material has been provided by the authors to give readers additional information about their work.

eTable 1. Univariate Cox Proportional Hazards Models Assessing Associations of Characteristics With Cigarette Smoking Relapse for the All Former Group<sup>a</sup>

| Characteristic <sup>b</sup><br>Category                   | Unweighted <i>n</i> | Estimate | Standard Error | t Value | P Value | HR (95% CI) <sup>c</sup> |
|-----------------------------------------------------------|---------------------|----------|----------------|---------|---------|--------------------------|
| Past 12-month use of ENDS <sup>d</sup>                    | 2,223               | 2.303    | 0.1749         | 13.17   | <0.0001 | 10.01 (7.07-14.15)       |
| Past 12-month use of OTP <sup>d</sup>                     | 2,263               | 1.716    | 0.1663         | 10.32   | <0.0001 | 5.56 (4.00-7.74)         |
| Past 12-month GAIN-SS internalizing problems <sup>d</sup> | 2,221               | 0.324    | 0.0928         | 3.49    | 0.0007  | 1.38 (1.15-1.66)         |
| Past 12-month GAIN-SS externalizing problems <sup>d</sup> | 2,179               | 0.208    | 0.1041         | 2.00    | 0.0480  | 1.23 (1.00-1.51)         |
| Past 12-month GAIN-SS substance use problems <sup>d</sup> | 2,150               | 0.382    | 0.1427         | 2.68    | 0.0086  | 1.47 (1.10-1.95)         |
| Years quit cigarettes                                     | 2,270               | -0.167   | 0.0229         | -7.30   | <0.0001 | 0.85 (0.81-0.89)         |
| Age at which began smoking cigarettes fairly regularly    | 2,024               | 0.024    | 0.0250         | 0.96    | 0.3377  | 1.02 (0.98-1.08)         |
| Average number of cigarettes smoked per day               | 2,017               | -0.007   | 0.0225         | -0.31   | 0.7548  | 0.99 (0.95-1.04)         |
| Number of years smoked 100+ cigarettes                    | 2,259               | 0.012    | 0.0061         | 1.90    | 0.0604  | 1.01 (1.00-1.02)         |
| Gender                                                    |                     |          |                |         |         |                          |
| Male                                                      | 2,273               | Ref.     | Ref.           | Ref.    | Ref.    | Ref.                     |
| Female                                                    |                     | 0.469    | 0.1561         | 3.01    | 0.0033  | 1.60 (1.17-2.18)         |
| Age                                                       | 2,273               | -0.054   | 0.0064         | -8.49   | <0.0001 | 0.95 (0.94-0.96)         |
| Race/Ethnicity                                            |                     |          |                |         |         |                          |
| Non-Hispanic, White                                       | 2,273               | Ref.     | Ref.           | Ref.    | Ref.    | Ref.                     |
| Non-Hispanic, Black                                       |                     | 0.412    | 0.2547         | 1.62    | 0.1085  | 1.51 (0.91-2.50)         |
| Non-Hispanic other, including multi-racial                |                     | -0.346   | 0.4203         | -0.82   | 0.4118  | 0.71 (0.31-1.63)         |
| Hispanic                                                  |                     | 0.648    | 0.2303         | 2.81    | 0.0059  | 1.91 (1.21-3.02)         |
| Educational attainment                                    |                     |          |                |         |         |                          |
| Less than High School or GED                              | 2,273               | Ref.     | Ref.           | Ref.    | Ref.    | Ref.                     |
| High school graduate                                      |                     | -0.536   | 0.2943         | -1.82   | 0.0713  | 0.59 (0.33-1.05)         |
| Some college or associates degree                         |                     | -0.369   | 0.2365         | -1.56   | 0.1223  | 0.69 (0.43-1.11)         |
| Bachelor degree                                           |                     | -0.466   | 0.3162         | -1.47   | 0.1435  | 0.63 (0.34-1.18)         |
| Advanced degree                                           |                     | -1.070   | 0.4252         | -2.52   | 0.0135  | 0.34 (0.15-0.80)         |
| Household income                                          |                     |          |                |         |         |                          |
| Less than \$25,000                                        | 2,085               | Ref.     | Ref.           | Ref.    | Ref.    | Ref.                     |
| \$25,000 - \$49,999                                       |                     | -0.220   | 0.2296         | -0.96   | 0.3407  | 0.80 (0.51-1.27)         |
| \$50,000 - \$74,999                                       |                     | -0.512   | 0.2491         | -2.06   | 0.0423  | 0.60 (0.37-0.98)         |
| \$75,000 or more                                          |                     | -0.683   | 0.2292         | -2.98   | 0.0036  | 0.51 (0.32-0.80)         |

<sup>a</sup>Key: ENDS, electronic nicotine delivery systems; OTP, other tobacco products, i.e., cigars, pipe tobacco, hookah, snus tobacco, other smokeless tobacco, and dissolvable tobacco; Ref., reference category. All Former, Former established cigarette smokers who were not current users of any

tobacco product at their Wave 1 interview. <sup>b</sup>See Table 1 for characteristic variable descriptions. <sup>c</sup>HR, hazard ratio; 95% CI, 95% confidence intervals. <sup>d</sup>Time-dependent variables.

eTable 2. Univariate Cox Proportional Hazards Models Assessing Associations of Characteristics With Cigarette Smoking Relapse for Recent Former Group<sup>a</sup>

| Characteristic <sup>b</sup><br>Category                   | Unweighted <i>n</i> | Estimate | Standard Error | t Value | P Value | HR (95% CI) <sup>c</sup> |
|-----------------------------------------------------------|---------------------|----------|----------------|---------|---------|--------------------------|
| Past 12-month use of ENDS <sup>d</sup>                    | 363                 | 0.725    | 0.2193         | 3.30    | 0.0013  | 2.06 (1.34-3.19)         |
| Past 12-month use of OTP <sup>d</sup>                     | 382                 | 0.578    | 0.2210         | 2.61    | 0.0103  | 1.78 (1.15-2.76)         |
| Past 12-month GAIN-SS internalizing problems <sup>d</sup> | 372                 | 0.152    | 0.1133         | 1.34    | 0.1821  | 1.16 (0.93-1.46)         |
| Past 12-month GAIN-SS externalizing problems <sup>d</sup> | 373                 | -0.022   | 0.1395         | -0.16   | 0.8732  | 0.98 (0.74-1.29)         |
| Past 12-month GAIN-SS substance use problems <sup>d</sup> | 363                 | -0.077   | 0.1874         | -0.41   | 0.6839  | 0.93 (0.64-1.34)         |
| Days quit cigarettes                                      | 384                 | -0.002   | 0.0006         | -3.16   | 0.0021  | 0.998 (0.997-0.999)      |
| Age at which began smoking cigarettes fairly regularly    | 351                 | -0.012   | 0.0205         | -0.61   | 0.5440  | 0.99 (0.95-1.03)         |
| Average number of cigarettes smoked per day               | 350                 | -0.010   | 0.0136         | -0.71   | 0.4771  | 0.99 (0.96-1.02)         |
| No. of years smoked 100+ cigarettes                       | 384                 | 0.000    | 0.0062         | 0.04    | 0.9695  | 1.00 (0.99-1.01)         |
| Gender                                                    |                     |          |                |         |         |                          |
| Male                                                      | 384                 | Ref.     | Ref.           | Ref.    | Ref.    | Ref.                     |
| Female                                                    |                     | 0.453    | 0.1909         | 2.37    | 0.0196  | 1.57 (1.08-2.30)         |
| Age                                                       | 384                 | -0.002   | 0.0071         | -0.24   | 0.8098  | 1.00 (0.98-1.01)         |
| Race/Ethnicity                                            |                     |          |                |         |         |                          |
| Non-Hispanic, White                                       | 384                 | Ref.     | Ref.           | Ref.    | Ref.    | Ref.                     |
| Non-Hispanic, Black                                       |                     | 0.380    | 0.3076         | 1.23    | 0.2201  | 1.46 (0.79-2.69)         |
| Non-Hispanic other, including multi-racial                |                     | -0.585   | 0.5170         | -1.13   | 0.2605  | 0.56 (0.2-1.55)          |
| Hispanic                                                  |                     | -0.017   | 0.3351         | -0.05   | 0.9602  | 0.98 (0.51-1.91)         |
| Educational attainment                                    |                     |          |                |         |         |                          |
| Less than High School or GED                              | 384                 | Ref.     | Ref.           | Ref.    | Ref.    | Ref.                     |
| High school graduate                                      |                     | -0.280   | 0.3915         | -0.72   | 0.4761  | 0.76 (0.35-1.64)         |
| Some college or associates degree                         |                     | -0.224   | 0.2963         | -0.76   | 0.4511  | 0.80 (0.44-1.440)        |
| Bachelor's degree                                         |                     | -0.358   | 0.4149         | -0.86   | 0.3900  | 0.70 (0.31-1.59)         |
| Advanced degree                                           |                     | -0.866   | 0.6069         | -1.43   | 0.1569  | 0.42 (0.13-1.40)         |
| Household income                                          |                     |          |                |         |         |                          |
| Less than \$25,000                                        | 350                 | Ref.     | Ref.           | Ref.    | Ref.    | Ref.                     |
| \$25,000 - \$49,999                                       |                     | 0.188    | 0.3063         | 0.61    | 0.5416  | 1.21 (0.66-2.22)         |
| \$50,000 - \$74,999                                       |                     | -0.116   | 0.3590         | -0.32   | 0.7473  | 0.89 (0.44-1.82)         |
| \$75,000 or more                                          |                     | 0.161    | 0.2628         | 0.61    | 0.5406  | 1.18 (0.70-1.98)         |

<sup>a</sup>Key: ENDS, electronic nicotine delivery systems; OTP, other tobacco products, i.e., cigars, pipe tobacco, hookah, snus tobacco, other smokeless tobacco, and dissolvable tobacco; Ref., reference category. Recent Former, Former established cigarette smokers who became former cigarette

smokers within the past 12 months of their Wave 1 interview and were not current users of any tobacco product at their Wave 1 interview. <sup>b</sup>See Table 1 for characteristic variable descriptions. <sup>c</sup>HR, hazard ratio; 95% CI, 95% confidence intervals. <sup>d</sup>Time-dependent variables.

eTable 3. Univariate Cox Proportional Hazards Models Assessing Associations of Characteristics With Cigarette Smoking Relapse for Long-Term Former Group<sup>a</sup>

| Characteristic <sup>b</sup><br>Category                   | Unweighted <i>n</i> | Estimate | Standard<br>Error | t Value | P Value | HR (95% CI) <sup>c</sup> |
|-----------------------------------------------------------|---------------------|----------|-------------------|---------|---------|--------------------------|
| Past 12-month use of ENDS <sup>d</sup>                    | 1,858               | 2.386    | 0.2564            | 9.31    | <0.0001 | 10.87 (6.54-18.08)       |
| Past 12-month use of OTP <sup>d</sup>                     | 1,878               | 1.905    | 0.2793            | 6.82    | <0.0001 | 6.72 (3.86-11.69)        |
| Past 12-month GAIN-SS internalizing problems <sup>d</sup> | 1,846               | 0.181    | 0.1404            | 1.29    | 0.2013  | 1.20 (0.91-1.58)         |
| Past 12-month GAIN-SS externalizing problems <sup>d</sup> | 1,803               | 0.246    | 0.1831            | 1.34    | 0.1822  | 1.28 (0.89-1.84)         |
| Past 12-month GAIN-SS substance use problems <sup>d</sup> | 1,784               | 0.383    | 0.2500            | 1.53    | 0.1282  | 1.47 (0.89-2.41)         |
| Years quit cigarettes                                     | 1,886               | -0.102   | 0.0162            | -6.31   | <0.0001 | 0.90 (0.87-0.93)         |
| Age at which began smoking cigarettes fairly regularly    | 1,671               | 0.013    | 0.0632            | 0.21    | 0.8315  | 1.01 (0.89-1.15)         |
| Ave. no. of cigarettes smoked per day                     | 1,667               | 0.000    | 0.0258            | 0.01    | 0.9925  | 1.00 (0.95-1.05)         |
| No. of years smoked 100+ cigarettes                       | 1,875               | 0.004    | 0.0114            | 0.31    | 0.7564  | 1.00 (0.98-1.03)         |
| Gender                                                    |                     |          |                   |         |         |                          |
| Male                                                      | 1,886               | Ref.     | Ref.              | Ref.    | Ref.    | Ref.                     |
| Female                                                    |                     | 0.338    | 0.2367            | 1.43    | 0.1561  | 1.40 (0.88-2.24)         |
| Age                                                       | 1,886               | -0.051   | 0.0114            | -4.46   | <0.0001 | 0.95 (0.93-0.97)         |
| Race/Ethnicity                                            |                     |          |                   |         |         |                          |
| Non-Hispanic, White                                       | 1,886               | Ref.     | Ref.              | Ref.    | Ref.    | Ref.                     |
| Non-Hispanic, Black                                       |                     | 0.224    | 0.4339            | 0.52    | 0.6073  | 1.25 (0.53-2.96)         |
| Non-Hispanic other, including multi-racial                |                     | -0.664   | 0.7050            | -0.94   | 0.3486  | 0.52 (0.13-2.09)         |
| Hispanic                                                  |                     | 0.751    | 0.3393            | 2.21    | 0.0292  | 2.12 (1.08-4.15)         |
| Educational attainment                                    |                     |          |                   |         |         |                          |
| Less than High School or GED                              | 1,886               | Ref.     | Ref.              | Ref.    | Ref.    | Ref.                     |
| High school graduate                                      |                     | -0.845   | 0.4789            | -1.76   | 0.0808  | 0.43 (0.17-1.11)         |
| Some college or associates degree                         |                     | -0.463   | 0.4442            | -1.04   | 0.2995  | 0.63 (0.26-1.52)         |
| Bachelor's degree                                         |                     | -0.264   | 0.4747            | -0.56   | 0.5793  | 0.77 (0.30-1.97)         |
| Advanced degree                                           |                     | -0.605   | 0.5611            | -1.08   | 0.2833  | 0.55 (0.18-1.66)         |
| Household income                                          |                     |          |                   |         |         |                          |
| Less than \$25,000                                        | 1,733               | Ref.     | Ref.              | Ref.    | Ref.    | Ref.                     |
| \$25,000 - \$49,999                                       |                     | -0.074   | 0.3634            | -0.20   | 0.8390  | 0.93 (0.45-1.91)         |
| \$50,000 - \$74,999                                       |                     | -0.296   | 0.3822            | -0.78   | 0.4400  | 0.74 (0.35-1.59)         |
| \$75,000 or more                                          |                     | -0.661   | 0.3585            | -1.84   | 0.0681  | 0.52 (0.25-1.05)         |

<sup>a</sup>Key: ENDS, electronic nicotine delivery systems; OTP, other tobacco products, i.e., cigars, pipe tobacco, hookah, snus tobacco, other smokeless tobacco, and dissolvable tobacco; Ref., reference category. Long-Term Former, Former established cigarette smokers who became former

cigarette smokers more than 12 months before their Wave 1 interview and who were not current users of any tobacco product at their Wave 1 interview. <sup>b</sup>See Table 1 for characteristic variable descriptions. <sup>c</sup>HR, hazard ratio; 95% CI, 95% confidence intervals. <sup>d</sup>Time-dependent variables.

eTable 4. Cox Proportional Hazards Model with Covariates Assessing Associations of Characteristics With Cigarette Smoking Relapse for All Former Group

(Unweighted  $n = 1858$ )<sup>a</sup>.

| Covariate <sup>b</sup><br>Category                        | Estimate | Standard<br>Error | t Value | P Value | AHR (95% CI) <sup>c</sup> |
|-----------------------------------------------------------|----------|-------------------|---------|---------|---------------------------|
| Past 12-month use of ENDS <sup>d</sup>                    | 1.091    | 0.2192            | 4.98    | <0.0001 | 2.98 (1.93-4.60)          |
| Past 12-month use of OTP <sup>d</sup>                     | 1.009    | 0.1947            | 5.18    | <0.0001 | 2.74 (1.86-4.04)          |
| Past 12-month GAIN-SS internalizing problems <sup>d</sup> | 0.074    | 0.1458            | 0.51    | 0.6122  | 1.08 (0.81-1.44)          |
| Past 12-month GAIN-SS externalizing problems <sup>d</sup> | -0.119   | 0.1474            | -0.81   | 0.4208  | 0.89 (0.66-1.19)          |
| Past 12-month GAIN-SS substance use problems <sup>d</sup> | -0.104   | 0.1814            | -0.58   | 0.5660  | 0.90 (0.63-1.29)          |
| Years quit cigarettes                                     | -0.142   | 0.0244            | -5.81   | <0.0001 | 0.87 (0.83-0.91)          |
| Gender                                                    |          |                   |         |         |                           |
| Male                                                      | Ref.     | Ref.              | Ref.    | Ref.    | Ref.                      |
| Female                                                    | -0.396   | 0.2039            | -1.94   | 0.0550  | 0.67 (0.45-1.01)          |
| Age                                                       | -0.002   | 0.0067            | -0.37   | 0.7130  | 1.00 (0.98-1.01)          |
| Race/Ethnicity                                            |          |                   |         |         |                           |
| Non-Hispanic, White                                       | Ref.     | Ref.              | Ref.    | Ref.    | Ref.                      |
| Non-Hispanic, Black                                       | -1.202   | 0.4891            | -2.46   | 0.0157  | 0.30 (0.11-0.79)          |
| Non-Hispanic other, including multi-racial                | -0.207   | 0.2842            | -0.73   | 0.4688  | 0.81 (0.46-1.43)          |
| Hispanic                                                  | -0.516   | 0.2278            | -2.27   | 0.0256  | 0.60 (0.38-0.94)          |
| Educational attainment                                    |          |                   |         |         |                           |
| Less than High School or GED                              | Ref.     | Ref.              | Ref.    | Ref.    | Ref.                      |
| High school graduate                                      | -0.251   | 0.2578            | -0.98   | 0.3319  | 0.78 (0.47-1.30)          |
| Some college or associates degree                         | -0.019   | 0.3903            | -0.05   | 0.9604  | 0.98 (0.45-2.13)          |
| Bachelor degree                                           | -0.165   | 0.5224            | -0.32   | 0.7526  | 0.85 (0.30-2.39)          |
| Advanced degree                                           | 0.037    | 0.2861            | 0.13    | 0.8981  | 1.04 (0.59-1.83)          |
| Household income                                          |          |                   |         |         |                           |
| Less than \$25,000                                        | Ref.     | Ref.              | Ref.    | Ref.    | Ref.                      |
| \$25,000 - \$49,999                                       | -0.017   | 0.3188            | -0.05   | 0.9567  | 0.98 (0.52-1.85)          |
| \$50,000 - \$74,999                                       | -0.134   | 0.3883            | -0.34   | 0.7316  | 0.88 (0.41-1.89)          |
| \$75,000 or more                                          | 0.126    | 0.2427            | 0.52    | 0.6060  | 1.13 (0.70-1.84)          |

<sup>a</sup>Key: ENDS, electronic nicotine delivery systems; OTP, other tobacco products, i.e., cigars, pipe tobacco, hookah, snus tobacco, other smokeless tobacco, and dissolvable tobacco; Ref., reference category. All Former, Former established cigarette smokers who were not current users of any tobacco product at their Wave 1 interview.



<sup>b</sup>See Table 1 for characteristic variable descriptions.

<sup>c</sup>AHR, adjusted hazard ratio; 95% CI, 95% confidence intervals.

<sup>d</sup>Time-dependent variables.

eTable 5. Cox Proportional Hazards Model with Covariates Assessing Associations of Characteristics With Cigarette Smoking Relapse for Recent Former Group

(Unweighted  $n = 304$ )<sup>a</sup>.

| Covariate <sup>b</sup><br>Category                        | Estimate | Standard<br>Error | t Value | P Value | AHR (95% CI) <sup>c</sup> |
|-----------------------------------------------------------|----------|-------------------|---------|---------|---------------------------|
| Past 12-month use of ENDS <sup>d</sup>                    | 0.485    | 0.2231            | 2.18    | 0.0320  | 1.63 (1.04-2.53)          |
| Past 12-month use of OTP <sup>d</sup>                     | 0.677    | 0.2208            | 3.06    | 0.0028  | 1.97 (1.27-3.05)          |
| Past 12-month GAIN-SS internalizing problems <sup>d</sup> | 0.150    | 0.1715            | 0.87    | 0.3843  | 1.16 (0.83-1.63)          |
| Past 12-month GAIN-SS externalizing problems <sup>d</sup> | 0.010    | 0.1838            | 0.06    | 0.9556  | 1.01 (0.70-1.46)          |
| Past 12-month GAIN-SS substance use problems <sup>d</sup> | -0.316   | 0.2451            | -1.29   | 0.1996  | 0.73 (0.45-1.19)          |
| Days quit cigarettes                                      | -0.002   | 0.0008            | -2.46   | 0.0155  | 0.998 (0.996-1.00)        |
| Gender                                                    |          |                   |         |         |                           |
| Male                                                      | Ref.     | Ref.              | Ref.    | Ref.    | Ref.                      |
| Female                                                    | -0.545   | 0.2796            | -1.95   | 0.0540  | 0.58 (0.33-1.01)          |
| Age                                                       | 0.004    | 0.0077            | 0.46    | 0.6455  | 1.00 (0.99-1.02)          |
| Race/Ethnicity                                            |          |                   |         |         |                           |
| Non-Hispanic, White                                       | Ref.     | Ref.              | Ref.    | Ref.    | Ref.                      |
| Non-Hispanic, Black                                       | -1.146   | 0.5578            | -2.05   | 0.0425  | 0.32 (0.11-0.96)          |
| Non-Hispanic other race including multi-racial            | -0.567   | 0.4670            | -1.21   | 0.2277  | 0.57 (0.23-1.43)          |
| Hispanic                                                  | -0.392   | 0.3513            | -1.12   | 0.2673  | 0.68 (0.34-1.36)          |
| Educational attainment                                    |          |                   |         |         |                           |
| Less than High School or GED                              | Ref.     | Ref.              | Ref.    | Ref.    | Ref.                      |
| High school graduate                                      | -0.339   | 0.2951            | -1.15   | 0.2537  | 0.71 (0.40-1.28)          |
| Some college (no degree) or associates degree             | -0.403   | 0.4121            | -0.98   | 0.3304  | 0.67 (0.30-1.51)          |
| Bachelor's degree                                         | -1.160   | 0.6707            | -1.73   | 0.0867  | 0.31 (0.08-1.19)          |
| Advanced degree                                           | 0.430    | 0.4164            | 1.03    | 0.3040  | 1.54 (0.67-3.51)          |
| Household income                                          |          |                   |         |         |                           |
| Less than \$25,000                                        | Ref.     | Ref.              | Ref.    | Ref.    | Ref.                      |
| \$25,000 - \$49,999                                       | -0.550   | 0.4529            | -1.21   | 0.2276  | 0.58 (0.24-1.42)          |
| \$50,000 - \$74,999                                       | 0.171    | 0.3580            | 0.48    | 0.6331  | 1.19 (0.58-2.42)          |
| \$75,000 or more                                          | -0.384   | 0.3431            | -1.12   | 0.2653  | 0.68 (0.35-1.35)          |

<sup>a</sup>Key: ENDS, electronic nicotine delivery systems; OTP, other tobacco products, i.e., cigars, pipe tobacco, hookah, snus tobacco, other smokeless tobacco, and dissolvable tobacco; Ref., reference category. Recent Former, Former established cigarette smokers who became former cigarette smokers within the past 12 months of their Wave 1 interview and were not current users of any tobacco product at their Wave 1 interview.

<sup>b</sup>See Table 1 for characteristic variable descriptions.

<sup>c</sup>AHR, adjusted hazard ratio; 95% CI, 95% confidence intervals.

<sup>d</sup>Time-dependent variables.

eTable 6. Cox Proportional Hazards Model with Covariates Assessing Associations of Characteristics With Cigarette Smoking Relapse for Long-Term Former Group (Unweighted  $n = 1554$ )<sup>a</sup>.

| Covariates <sup>b</sup><br>Category                       | Estimate | Standard Error | t Value | P Value | AHR (95% CI) <sup>c</sup> |
|-----------------------------------------------------------|----------|----------------|---------|---------|---------------------------|
| Past 12-month use of ENDS <sup>d</sup>                    | 1.333    | 0.3894         | 3.42    | 0.0009  | 3.79 (1.75-8.20)          |
| Past 12-month use of OTP <sup>d</sup>                     | 1.341    | 0.3503         | 3.83    | 0.0002  | 3.82 (1.91-7.66)          |
| Past 12-month GAIN-SS internalizing problems <sup>d</sup> | 0.023    | 0.2065         | 0.11    | 0.9129  | 1.02 (0.68-1.54)          |
| Past 12-month GAIN-SS externalizing problems <sup>d</sup> | -0.108   | 0.2732         | -0.39   | 0.6939  | 0.90 (0.52-1.54)          |
| Past 12-month GAIN-SS substance use problems <sup>d</sup> | -0.039   | 0.3054         | -0.13   | 0.8977  | 0.96 (0.53-1.76)          |
| Years quit cigarettes                                     | -0.077   | 0.0168         | -4.55   | <0.0001 | 0.93 (0.90-0.96)          |
| Gender                                                    |          |                |         |         |                           |
| Male                                                      | Ref.     | Ref.           | Ref.    | Ref.    | Ref.                      |
| Female                                                    | -0.267   | 0.2637         | -1.01   | 0.3135  | 0.77 (0.45-1.29)          |
| Age                                                       | -0.012   | 0.0112         | -1.03   | 0.3069  | 0.99 (0.97-1.01)          |
| Race/Ethnicity                                            |          |                |         |         |                           |
| Non-Hispanic, White                                       | Ref.     | Ref.           | Ref.    | Ref.    | Ref.                      |
| Non-Hispanic, Black                                       | -1.353   | 0.7603         | -1.78   | 0.0782  | 0.26 (0.06-1.17)          |
| Non-Hispanic other, including multi-racial                | -0.022   | 0.4903         | -0.04   | 0.9644  | 0.98 (0.37-2.59)          |
| Hispanic                                                  | -0.577   | 0.4318         | -1.34   | 0.1843  | 0.56 (0.24-1.32)          |
| Educational attainment                                    |          |                |         |         |                           |
| Less than High School or GED                              | Ref.     | Ref.           | Ref.    | Ref.    | Ref.                      |
| High school graduate                                      | 0.079    | 0.4101         | 0.19    | 0.8473  | 1.08 (0.48-2.44)          |
| Some college or associates degree                         | 0.461    | 0.5751         | 0.8     | 0.4247  | 1.59 (0.51-4.96)          |
| Bachelor degree                                           | 0.559    | 0.6977         | 0.8     | 0.4247  | 1.75 (0.44-6.98)          |
| Advanced degree                                           | 0.069    | 0.4368         | 0.16    | 0.8751  | 1.07 (0.45-2.55)          |
| Household income                                          |          |                |         |         |                           |
| Less than \$25,000                                        | Ref.     | Ref.           | Ref.    | Ref.    | Ref.                      |
| \$25,000 - \$49,999                                       | 0.094    | 0.4369         | 0.22    | 0.8294  | 1.10 (0.46-2.62)          |
| \$50,000 - \$74,999                                       | -0.496   | 0.5968         | -0.83   | 0.4082  | 0.61 (0.19-1.99)          |
| \$75,000 or more                                          | 0.159    | 0.3394         | 0.47    | 0.6409  | 1.17 (0.60-2.30)          |

<sup>a</sup>Key: ENDS, electronic nicotine delivery systems; OTP, other tobacco products, i.e., cigars, pipe tobacco, hookah, snus tobacco, other smokeless tobacco, and dissolvable tobacco; Ref., reference category. Long-Term Former, Former established cigarette smokers who became former cigarette smokers more than 12 months before their Wave 1 interview and who were not current users of any tobacco product at their Wave 1 interview.

<sup>b</sup>See Table 1 for characteristic variable descriptions.

<sup>c</sup>AHR, adjusted hazard ratio; 95% CI, 95% confidence intervals. <sup>d</sup>Time-dependent variables.
